# Supplementary figures and images for: Influence of Brewer’s Spent Grain Compounds on Glucose Metabolism Enzymes
Source: MDPI journal article supplement (doi:10.3390/nu13082696), 2021-08-04

Scheme S1: Overview flow chart for extract preparation (A1-A7, HE1-HE6, HA1-HA3)

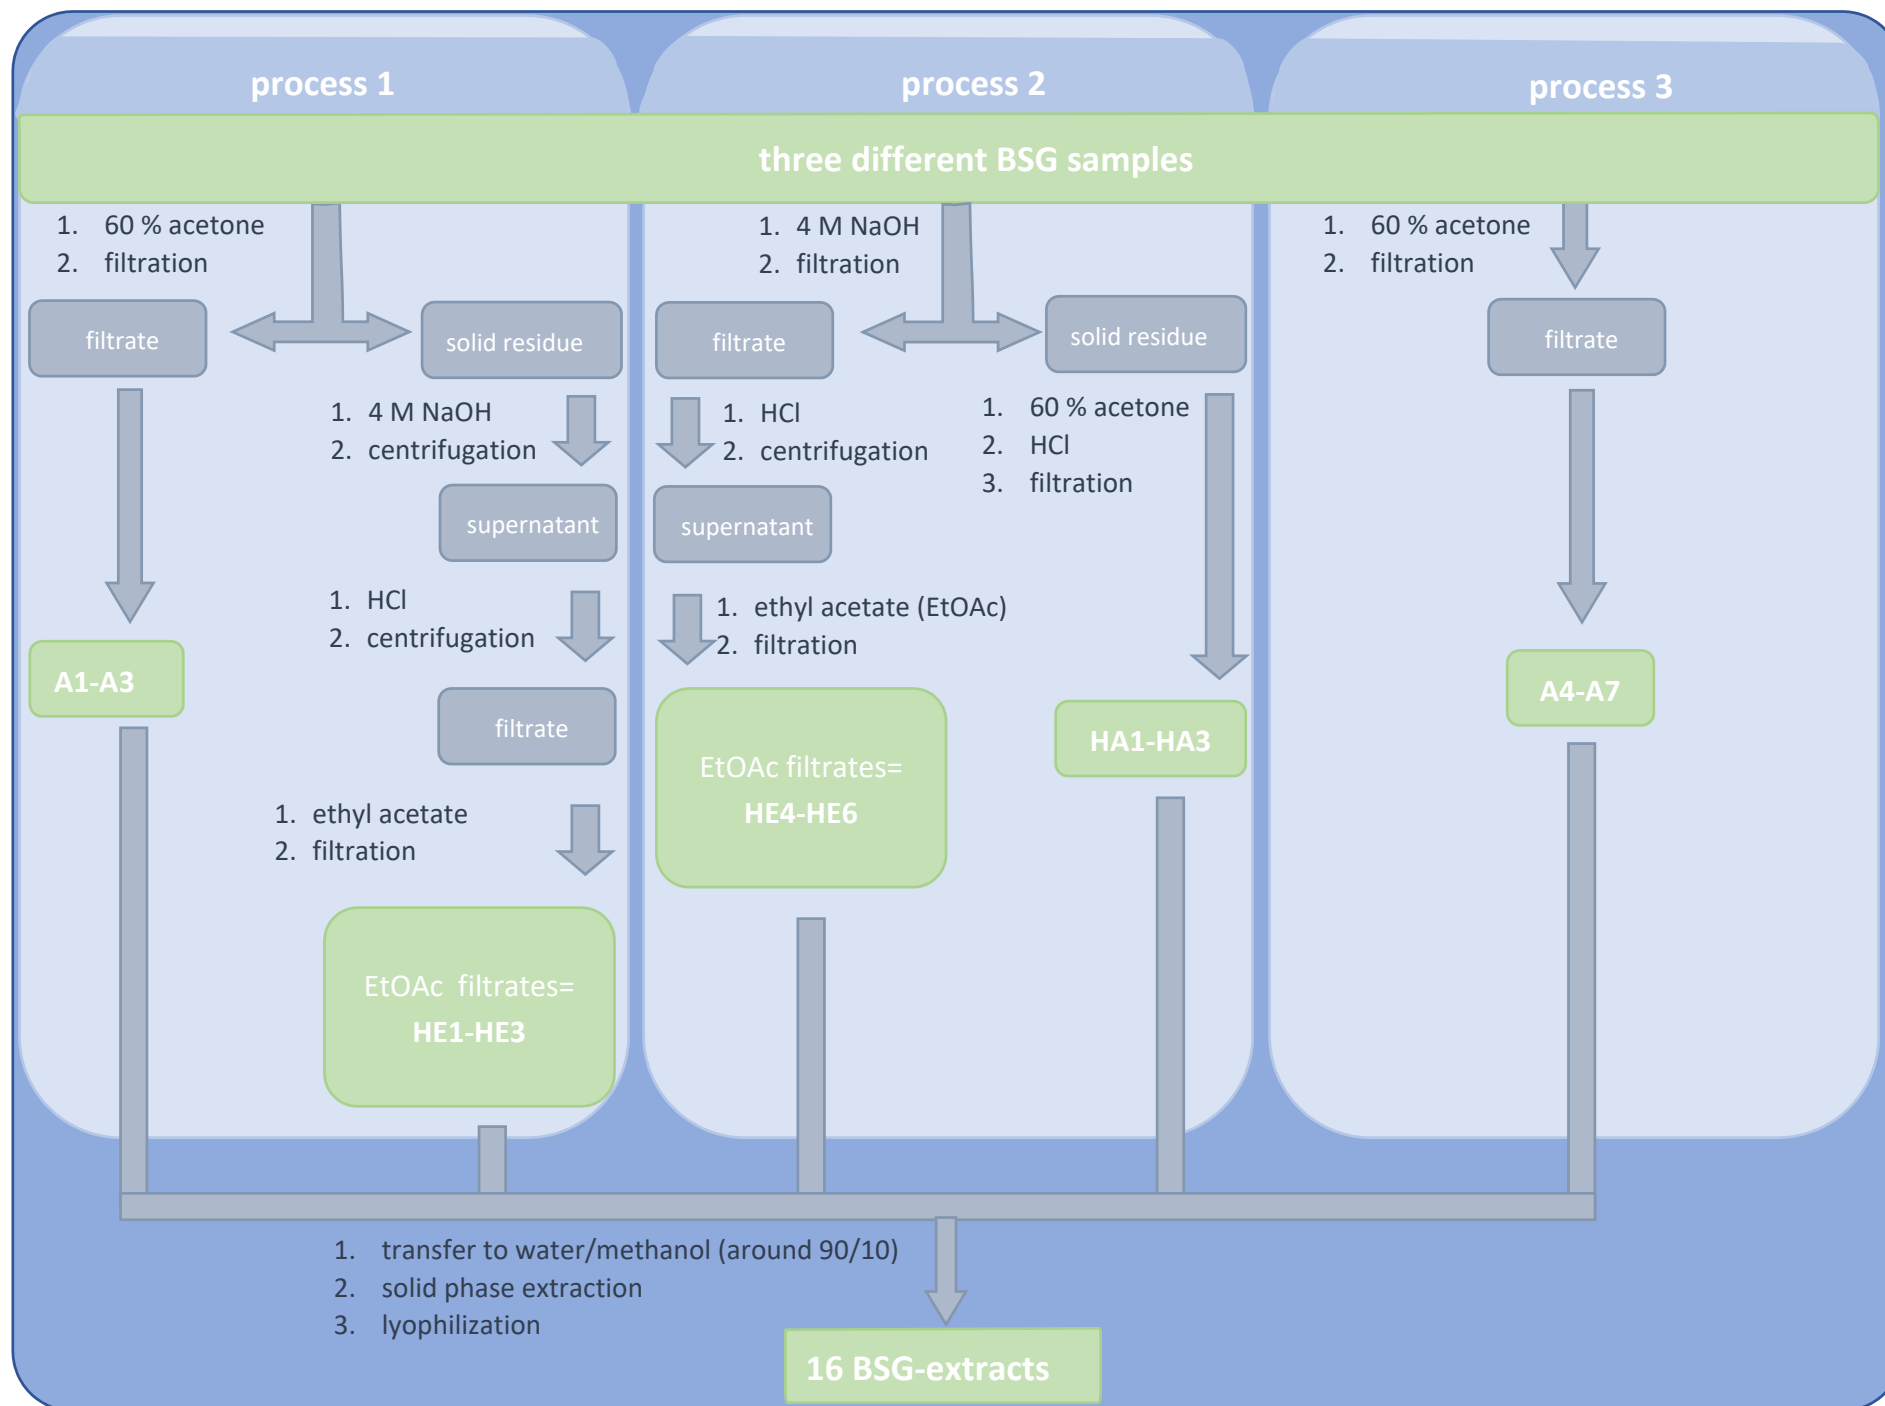

Supplement: s1 [file s1]
